# Supplementary material for: CFD simulation of spatiotemporal distribution of residual chlorine in secondary water supply tanks
Source: Royal Society of Chemistry journal article supplement (doi:10.1039/d2ew00659f), 2023-01-01
Supplement: d2ew00659f1.pdf [file d2ew00659f1.pdf]

## Supplementary material

### CFD simulation of spatiotemporal distribution of residual chlorine in secondary water supply tanks

Pei Hua<sup>a, b, \*</sup>, ZhenYu Wang<sup>a, b, c</sup>, Hui Wang<sup>d</sup>, Keila Roberta Ferreira de Oliveira<sup>e</sup>, Jin Zhang<sup>f</sup>, Guang-guo Ying<sup>a, b</sup>

<sup>a</sup> Environmental Research Institute, Guangdong Provincial Key Laboratory of Chemical Pollution and Environmental Safety & MOE Key Laboratory of Theoretical Chemistry of Environment, South China Normal University, Guangzhou 510006, China

<sup>b</sup> School of Environment, South China Normal University, University Town, Guangzhou 510006, China

<sup>c</sup> Institute of Urban and Industrial Water Management, Technische Universität Dresden, Dresden 01062, Germany

<sup>d</sup> HR Wallingford Hydraulic Environment Technology Consulting (Shanghai) Ltd, Pudong New District, Shanghai 0035, China

<sup>e</sup> Fundação Universidade Federal de Mato Grosso do Sul, Faculdade de Engenharias, Arquitetura e Urbanismo Geografia, Av. Costa e Silva, s/n<sup>o</sup> – Bairro Universitário, CEP: 79070-900 Campo Grande, MS, Brazil

<sup>f</sup> The National Key Laboratory of Water Disaster Prevention, Yangtze Institute for Conservation and Development, Yangtze Institute for Conservation and Development, Hohai University, 210098 Nanjing, China

\*Corresponding author:

pei.hua@m.scnu.edu.cn

**Fig. S1**

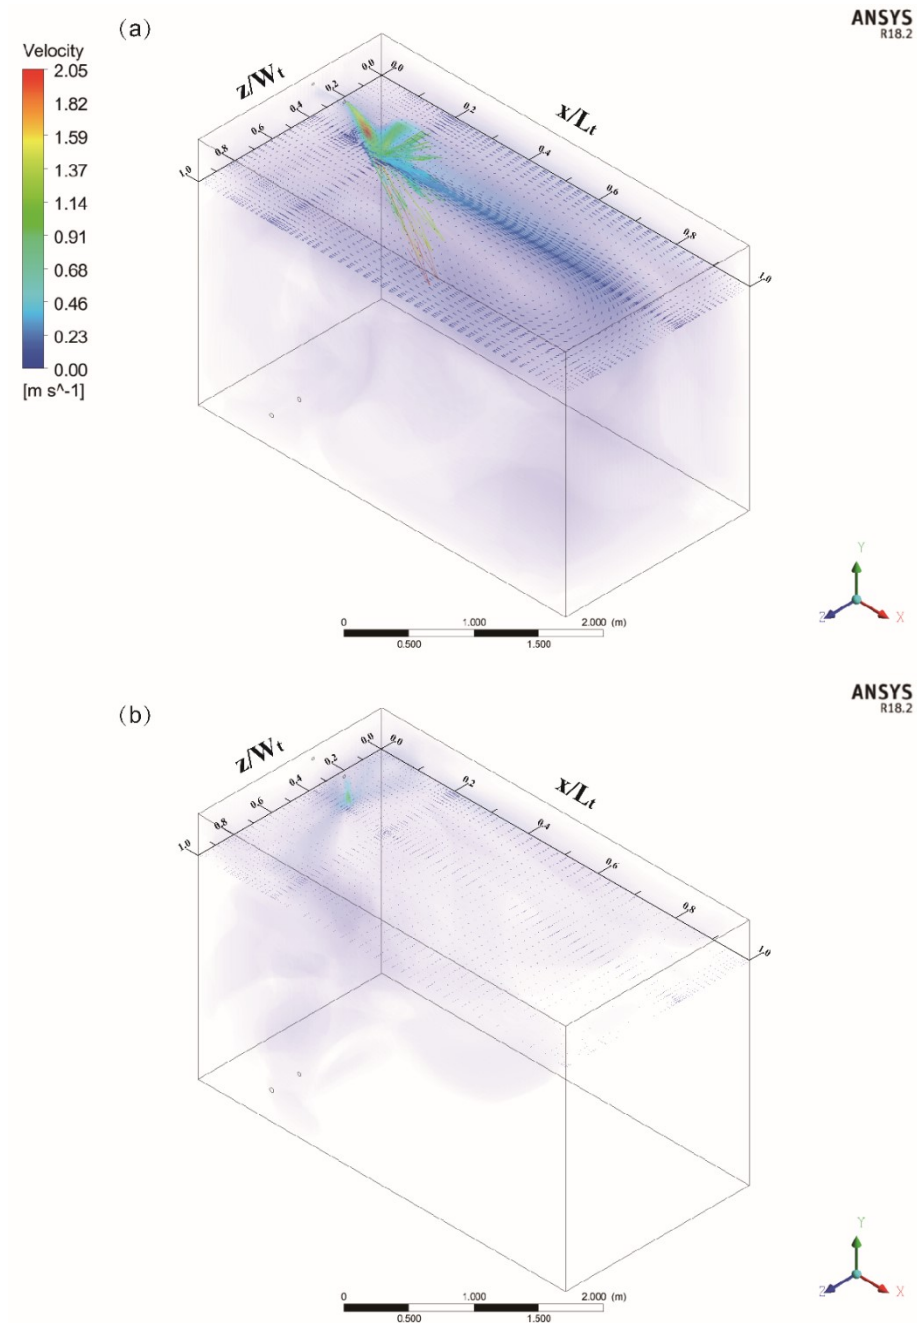

**Fig. S1** 3D flow profile at a) the common service conditions at 40 min when inflow velocity = 1.22 m/s; outflow velocity = 0 m/s; and b) at 60 min when inflow velocity = 0.10 m/s; outflow velocity = 0 m/s.

**Fig. S2**

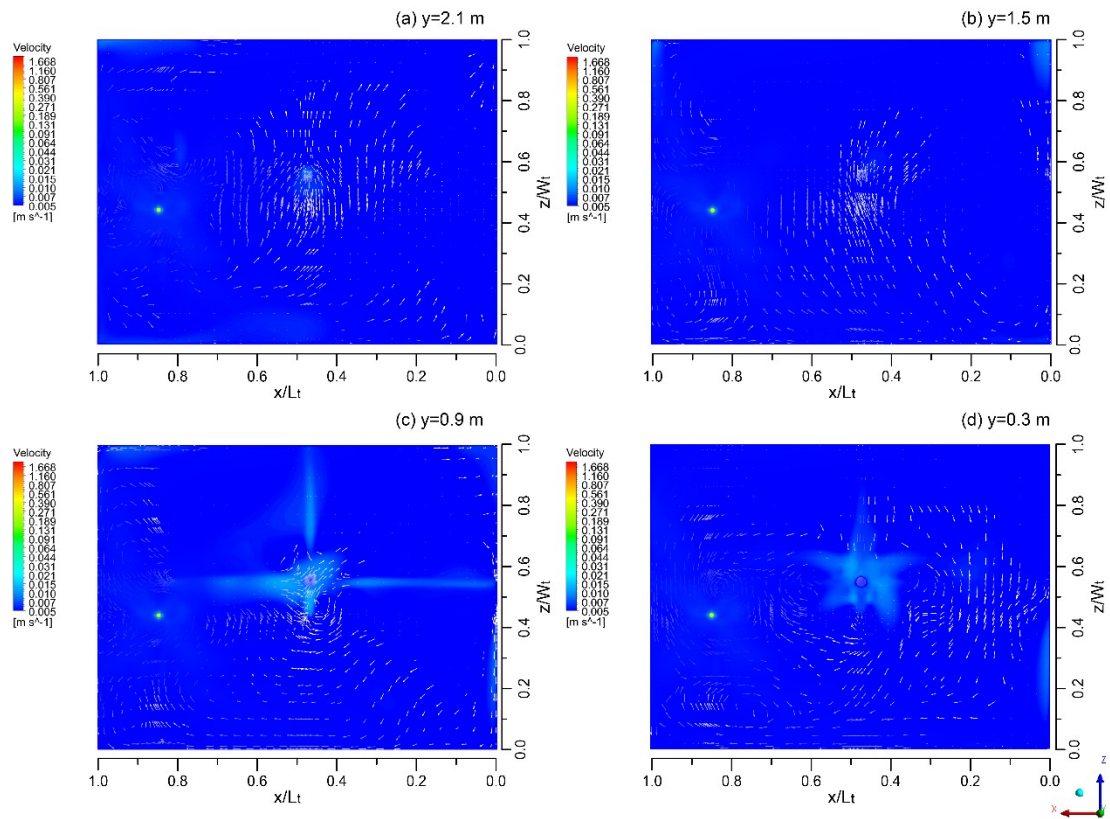

**Fig. S2** The simulated velocity profile at a horizontal cross-section 2.1 m (a), 1.5 m (b), 0.9 m(c), and 0.3 m(d) from the bottom of RLt under the operating condition.

**Fig. S3**

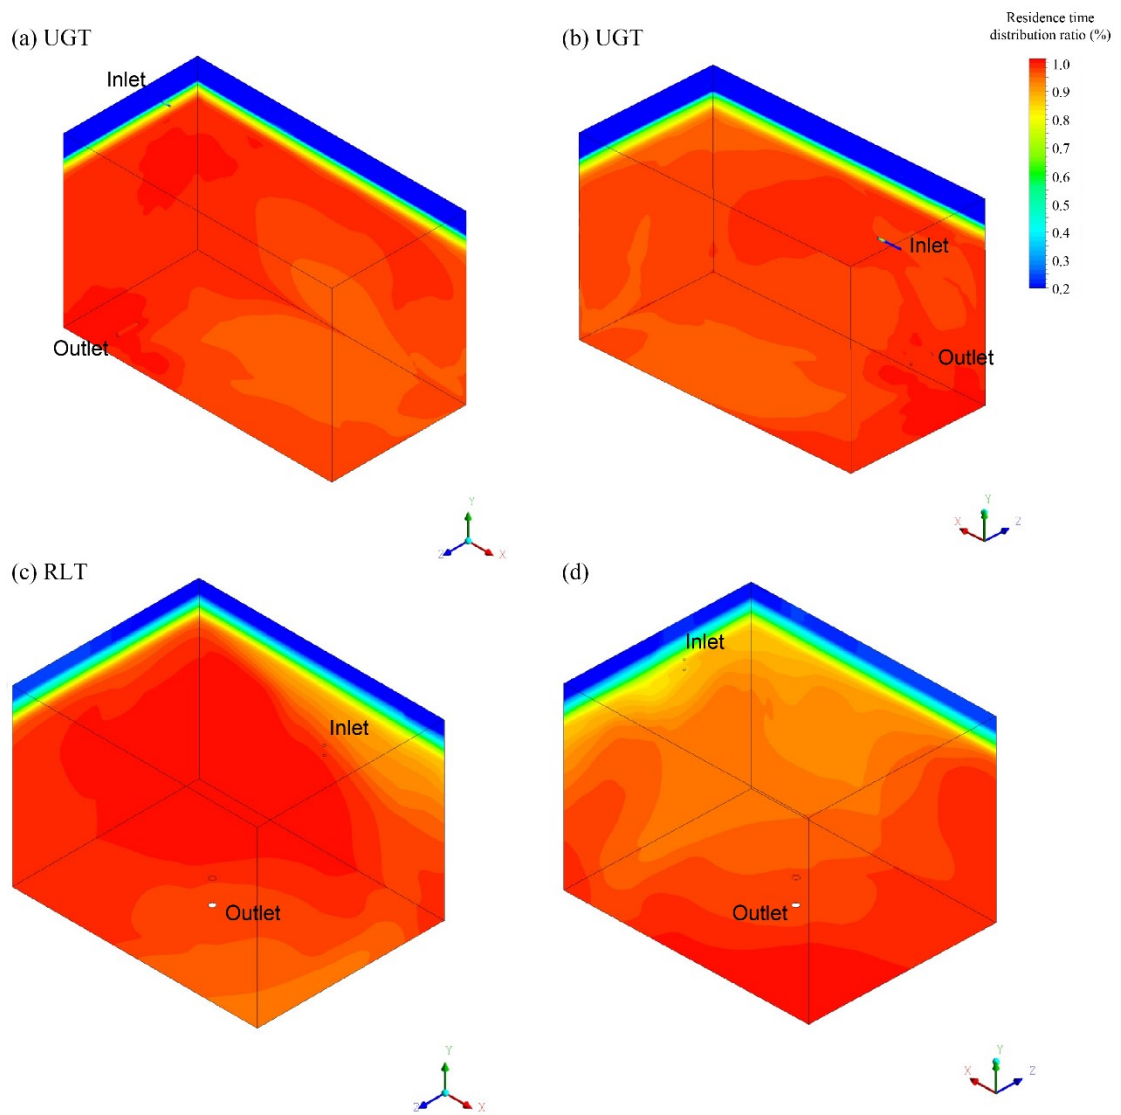

**Fig. S3** The spatial distribution of the mean age ratio of the residual chlorine in UGT and RLT at the end of simulation time.

**Fig. S4**

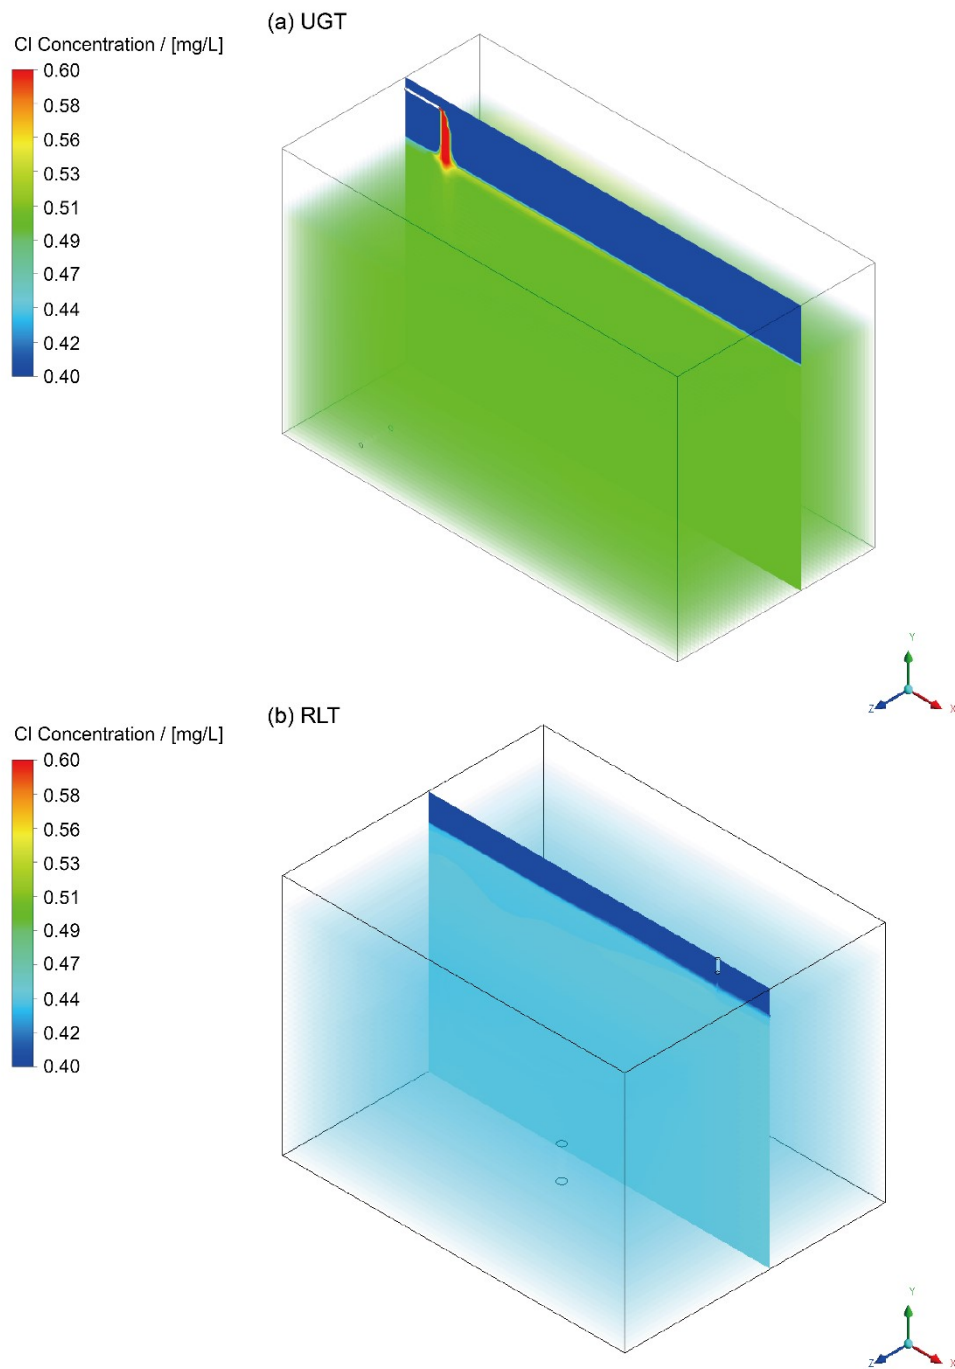

**Fig. S4** Chlorine distribution in a) UGT and b) RLT in the last simulation time of 1440th

min

**Fig. S5**

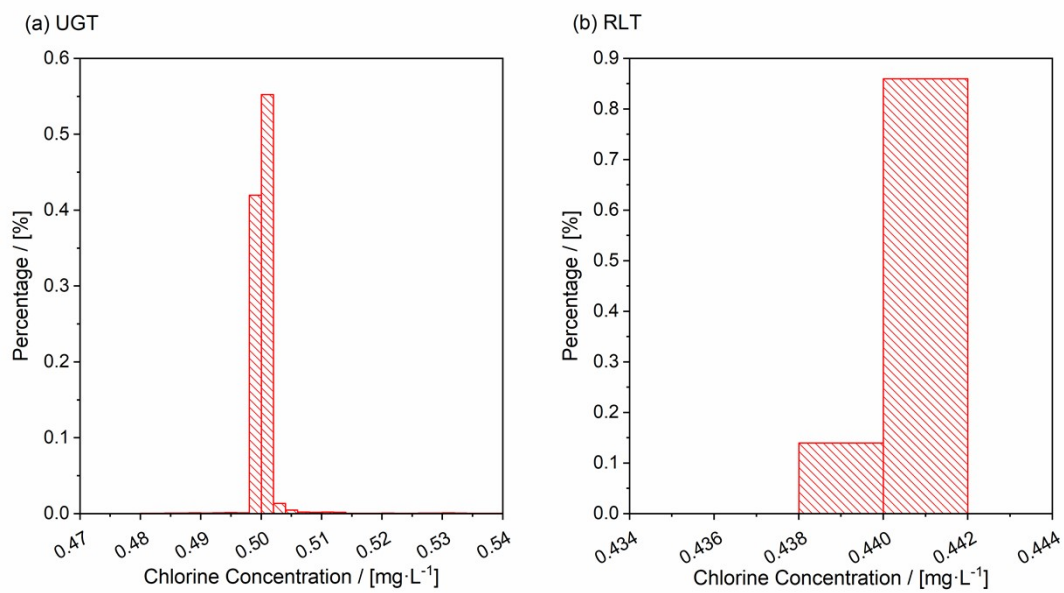

**Fig. S5** Histogram of chlorine concentration in the water of a) UGT and b) RLT. Bin size is  $0.002 \text{ mg}\cdot\text{L}^{-1}$

**Fig. S6**

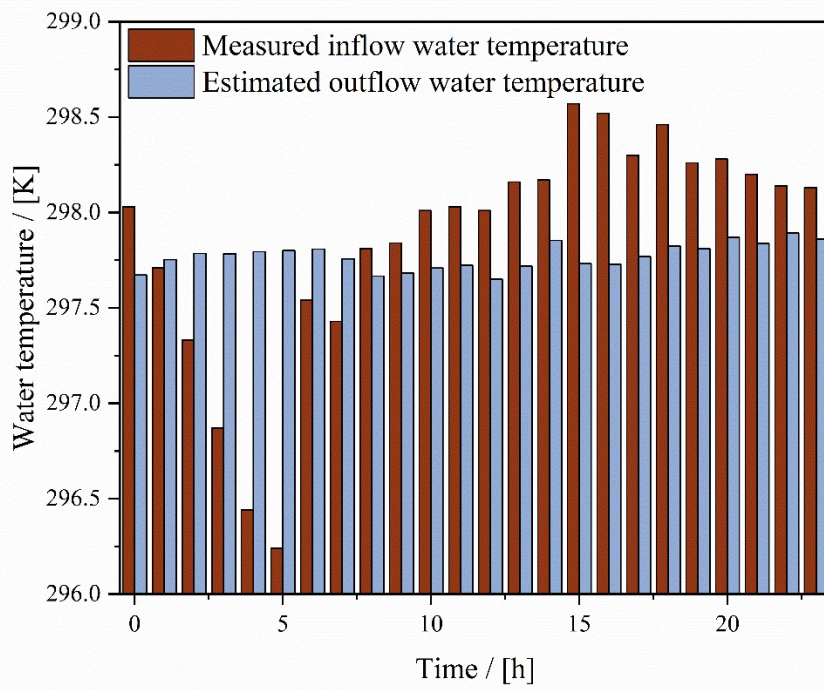

**Fig. S6** The water temperatures of measured inflow and estimated outflow for UGT.
